# Supplementary material for: Quality of Care in Performance-Based Financing: How It Is Incorporated in 32 Programs Across 28 Countries
Source: PubMed Central journal article supplement (PMC5493453; doi:10.9745/ghsp-d-16-00239), 2017-03-15
Supplement: GHSP-D-16-00239_16-00239-Gergen-Supplementary_material.pdf [file GHSP-D-16-00239_16-00239-Gergen-Supplementary_material.pdf]

**Supplement Table.** Sample of Performance-Based Financing (PBF) Programs (N=32) and Quality Checklists (N=68) Included in the Review

| Country (Year)                                 | Primary Donor          | Materials Included in This Assessment |           |                   |                                                                        |
|------------------------------------------------|------------------------|---------------------------------------|-----------|-------------------|------------------------------------------------------------------------|
|                                                |                        | Manual                                | Checklist | No. of Checklists | Health Level                                                           |
| <b>Afghanistan (2012)</b>                      | World Bank, USAID      | X                                     | X         | 1                 | Secondary/Tertiary (2012)                                              |
| <b>Armenia (2013)</b>                          | World Bank             | X                                     | X         | 1                 | Primary/Secondary (2014)                                               |
| <b>Benin (2014)</b>                            | World Bank, GF, Gavi   | X                                     | X         | 4                 | Primary (2010)<br>Tertiary (2010)<br>Primary (2014)<br>Tertiary (2014) |
| <b>Burkina Faso (2013)</b>                     | World Bank             |                                       | X         | 2                 | Primary (2011)<br>Tertiary (2011)                                      |
| <b>Burundi (2010)</b>                          | World Bank             | X                                     | X         | 2                 | Primary (2010)<br>Tertiary (2010)                                      |
| <b>Cameroon (2011)</b>                         | World Bank             | X                                     | X         | 2                 | Primary (2012)<br>Tertiary (2012)                                      |
| <b>Congo – Brazzaville (2013)</b>              | World Bank             |                                       | X         | 2                 | Primary (2014)<br>Tertiary (2014)                                      |
| <b>Democratic Republic of the Congo (2015)</b> | World Bank, UNICEF, GF | X                                     | X         | 2                 | Primary (2015)<br>Tertiary (2015)                                      |
| <b>Democratic Republic of the Congo (2014)</b> | USAID                  | X                                     | X         | 2                 | Primary (2011)<br>Tertiary (2012)                                      |
| <b>Djibouti (2014)</b>                         | World Bank             | X                                     | X         | 2                 | Primary (2014)<br>Tertiary (2014)                                      |
| <b>Gambia, The (2014)</b>                      | World Bank, HRITF      |                                       | X         | 2                 | Primary (2015)<br>Tertiary (2015)                                      |
| <b>Haiti (2014)</b>                            | World Bank, USAID      | X                                     | X         | 1                 | Primary (2013)                                                         |
| <b>Ivory Coast (2014)</b>                      | World Bank             | X                                     | X         | 1                 | Primary/Secondary/Tertiary (2014)                                      |
| <b>Kenya (2013)</b>                            | World Bank             | X                                     | X         | 3                 | Primary/Tertiary (2012)<br>Primary (2013)<br>Primary/Tertiary (2015)   |
| <b>Kyrgyz Republic (2013)</b>                  | World Bank             |                                       | X         | 1                 | Tertiary (2012)                                                        |
| <b>Laos (2014)</b>                             | World Bank             |                                       | X         | 1                 | Tertiary (2014)                                                        |

| Materials Included in This Assessment |                        |   |   |   |                                                                                                                |
|---------------------------------------|------------------------|---|---|---|----------------------------------------------------------------------------------------------------------------|
| <b>Lesotho (2013)</b>                 | World Bank             | X | X | 4 | Primary (2013)<br>Secondary (2013)<br>Primary (2014)<br>Secondary (2014)                                       |
| <b>Liberia (2013)</b>                 | World Bank             |   | X | 1 | Tertiary (2013)                                                                                                |
| <b>Malawi (2015)</b>                  | USAID                  | X | X | 1 | Primary (2015)                                                                                                 |
| <b>Malawi (2015)</b>                  | KfW, Norway            | X | X | 2 | Primary/Secondary/Tertiary (2014)<br>CEmONC (2015)                                                             |
| <b>Mozambique (2015)</b>              | CDC                    | X | X | 3 | Primary, IMM (2012)<br>Primary, IMQ (2012)<br>Primary/Secondary/Tertiary, PCI (2011)                           |
| <b>Nigeria (2014)</b>                 | World Bank             | X | X | 4 | Primary (2011) Tertiary (2011) Primary (2013)<br>Tertiary (2013)                                               |
| <b>Rwanda (2012)</b>                  | World Bank, CDC, USAID | X | X | 3 | Primary (2008)<br>Primary (2012)<br>CHWs (2009)                                                                |
| <b>Senegal (2012)</b>                 | World Bank             | X | X | 6 | Primary (2012)<br>Secondary (2012)<br>Primary (2013)<br>Secondary (2013)<br>Primary (2015)<br>Secondary (2015) |
| <b>Sierra Leone (2014)</b>            | World Bank             | X | X | 3 | Tertiary (2012)<br>Primary (2012)<br>Cross-cutting (2012)                                                      |
| <b>Tajikistan (2015)</b>              | World Bank             | X | X | 2 | Health House (2014)<br>Rural Health Center (2014)                                                              |
| <b>Tanzania (2015)</b>                | World Bank             | X | X | 2 | Primary (2015)<br>Secondary (2015)                                                                             |
| <b>Tanzania (2015)</b>                | Danida                 |   | X | 3 | IPC (2013)<br>Primary (2015)<br>Secondary/Tertiary (2015)                                                      |
| <b>Uganda (2011)</b>                  | UK Aid                 |   | X | 1 | Primary (2013)                                                                                                 |
| <b>Vietnam (2013)</b>                 | World Bank             |   | X | 2 | Primary (2014)<br>Secondary (2014)                                                                             |
| <b>Zambia (2010)</b>                  | World Bank             | X | X | 2 | Primary (2010)<br>Primary (2012)                                                                               |

Abbreviations: CDC, U.S. Centers for Disease Control and Prevention; CEmONC, comprehensive emergency obstetric and newborn care; CHW, community health worker; GF, Global Fund to Fight AIDS, Tuberculosis and Malaria; HRITF, Health Results Innovation Trust Fund; IMM, Instrumento da Melhora da Qualidade; IMQ, Iniciativa Maternidade Modelo; PCI, Prevention and Control of Infections ; KfW: Kreditanstalt Für Wiederaufbau; USAID, U.S. Agency of International Development.
